# Supplementary material for: Expression of Estrogen and Progesterone Receptor in Tumor Stroma Predicts Favorable Prognosis of Cervical Squamous Cell Carcinoma
Source: PubMed Central journal article supplement — Int J Gynecol Cancer. 2017 May 2;27(6):1247–55. doi: 10.1097/IGC.0000000000001004 (PMC5499963; doi:10.1097/igc.0000000000001004), 2017-05-02
Supplement: igj-27-1247-s001.pdf [file igj-27-1247-s001.pdf]

**TABLE S1.** Commonly used antibodies to detect ER and PR

| <b>Manufacturer</b>         | <b>Brand name</b> | <b>Description</b>                                                                                      | <b>Specificity</b> | <b>References (PMID/PMCID)</b> |
|-----------------------------|-------------------|---------------------------------------------------------------------------------------------------------|--------------------|--------------------------------|
| DakoCytomation, California  | ER-1D5            | Mouse IgG monoclonal antibody targeting at the A/B region of the N terminal domain of ER $\alpha$       | ER $\alpha$        | **20530450                     |
| Santa Cruz, CA              | MC20              | Rabbit polyclonal IgG targeting at the C-terminus of ER $\alpha$ of mouse origin                        | ER $\alpha$        | **PMC3816255                   |
| Leica, UK                   | clone 6F11        | Mouse Monoclonal Antibody                                                                               | ER $\alpha$        | **21491087                     |
| *Abcam                      | *ab108398         | Rabbit monoclonal [EPR4097] to Estrogen Receptor alpha                                                  | ER $\alpha$        | nil                            |
| BioGenex, California        | PGR-1A6           | A mouse monoclonal antibody to human progesterone receptor                                              | PRA, PRB           | **20530450                     |
| Leica, UK                   | clone 1A6         | A mouse monoclonal antibody to human progesterone receptor                                              | PRA, PRB           | **21491087                     |
| Santa Cruz, CA              | H190              | A rabbit polyclonal IgG                                                                                 | PRA, PRB           | **PMC3816255                   |
| DakoCytomation, CA          | PgR 636           | A mouse monoclonal anti-human progesterone receptor                                                     | PRA, PRB           | 15272277                       |
| Novocastra Laboratories, UK | PGR-312           | Reacts with both A and B forms of PR by Western blot but only with the A form by                        | PRA, PRB           | 21263043                       |
| Novocastra Laboratories, UK | PGR-B (SAN27)     | Prokaryotic recombinant protein corresponding to the 164 amino acid N-terminal region unique to the PRB | PRB                | 24300977                       |
| *Abcam                      | *YR85             | Rabbit monoclonal to progesterone receptor                                                              | PRB                | PMC3639048                     |

\* Antibody used in this present study

\*\*Reference cited in this article
