# Supplementary material for: Expression of Estrogen and Progesterone Receptor in Tumor Stroma Predicts Favorable Prognosis of Cervical Squamous Cell Carcinoma
Source: PubMed Central journal article supplement — Int J Gynecol Cancer. 2017 May 2;27(6):1247–55. doi: 10.1097/IGC.0000000000001004 (PMC5499963; doi:10.1097/igc.0000000000001004), 2017-05-02
Supplement: igj-27-1247-s002.pdf [file igj-27-1247-s002.pdf]

**TABLE S2.** Summary on ER/PR versus cervical cancer prognosis in previous studies

| <b>Author, year</b>            | <b>Receptor isoforms</b> | <b>Histology types</b>        | <b>Investigated tissue site</b> | <b>Main results</b>                                   | <b>Reference (PMID)</b>    |
|--------------------------------|--------------------------|-------------------------------|---------------------------------|-------------------------------------------------------|----------------------------|
| Shanla Masood et al., 1993     | ERa, PRA & PRB           | ADE, Clear cell carcinoma     | Carcinoma                       | ERa and PRs are good prognostic factors.              | 8319181                    |
| Fujiwara H et al., 1997        | ERa, PRs                 | ADE                           | Carcinoma                       | Both ERa and PRs are NOT prognostic factor.           | 9028361                    |
| Yoshiyuki Suzuki et al., 2000  | ERa, PRA                 | ADE , Adenosquamous carcinoma | Carcinoma                       | PRA is good prognostic factor for adenocarcinoma with | 10889376                   |
| Astrid Baalbergen et al., 2007 | ERa, PRA & PRB           | ADE, Adenosquamous carcinoma  | Carcinoma                       | Both ERa and PRs are NOT prognostic factor.           | 17354237                   |
| Bodner K et. A, 2010           | ERa, PRA & PRB           | ADE                           | Carcinoma                       | Both ERa and PRs are NOT prognostic factor.           | 20530450                   |
| Kwasniewska A et al., 2011     | ERa, PRA                 | ADE and SCC                   | Stroma and Carcinoma            | No prognostic analysis                                | 21491087                   |
| MK Hong et al.                 | ERa, PRB                 | SCC                           | Stroma and Carcinoma            | Stromal ERa and PRB are good prognostic factors       | <i>(The present study)</i> |

SCC: squamous cell carcinoma; ADE: adenocarcinoma
